# Supplementary material for: Interplay between the (Poly)phenol Metabolome, Gut Microbiome, and Cardiovascular Health in Women: A Cross-Sectional Study from the TwinsUK Cohort
Source: MDPI journal article supplement (doi:10.3390/nu15081900), 2023-04-14
Supplement: s1 [file s1]

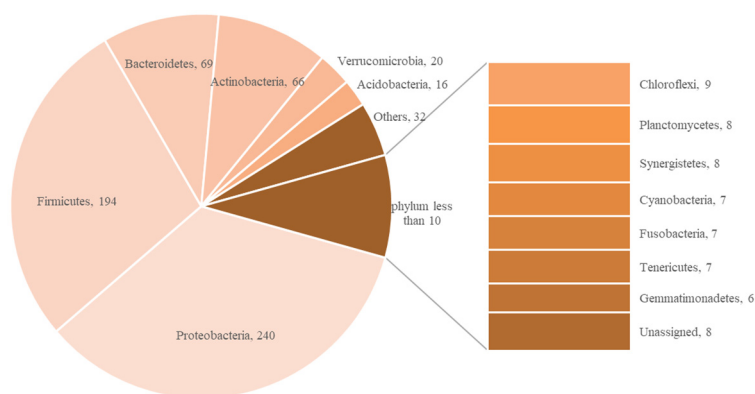

Supplement Figure S1. The contribution of each phylum. The category of *Others* represents the combination of phylum less than 3, including one *FBF*, *GN02*, *OD1*, *SR1*, *TM6*, *TM7*, *WPS-2*, *Caldithrix*, *Thermi*, *Deferribacteres*, *Fibrobacteres*, *Crenarchaeota*, *Euryarchaeota*, *Armatimonadetes*; two *WS3*, *Chlamydiae*, *Chlorobi*, *Elusimicrobia*, *Nitrospirae*; and three *Fibrobacteres*, *Lentisphaerae*, *Spirochaetes*.

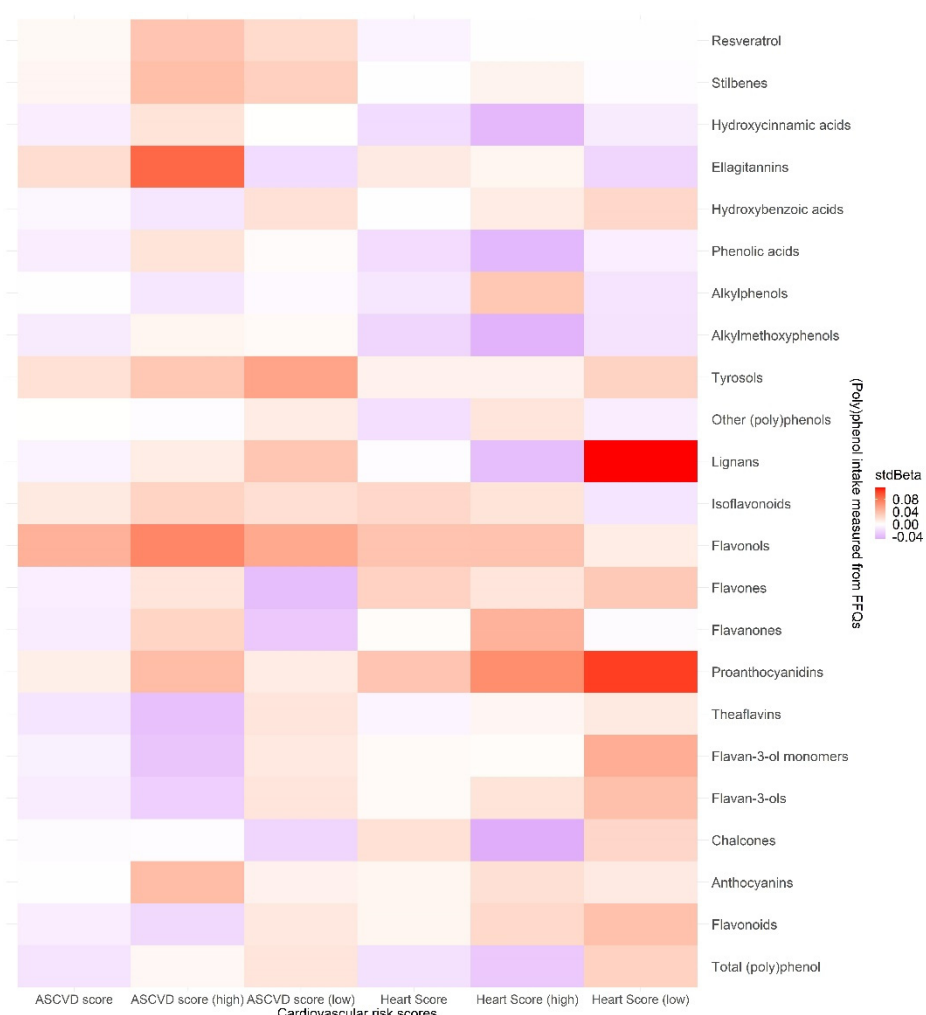

Supplement Figure S2. Associations between (poly)phenol intake measured from FFQs and cardiovascular risk scores in the TwinsUK cohort, adjusted for family relatedness, age, BMI, energy intake, and fibre intake. The colour scale indicates the effect (stdBeta) of each (poly)phenol intake on cardiovascular risk scores. Red and blue illustrate positive, and negative effects and colour intensity represents the degree of the effects. The asterisks showed significance (\*: all FDR adjusted  $p < 0.05$ ). ASCVD risk score, atherosclerotic cardiovascular disease risk score; BMI, body mass index; FFQs, food frequency questionnaires.
