# Supplementary material for: Interplay between the (Poly)phenol Metabolome, Gut Microbiome, and Cardiovascular Health in Women: A Cross-Sectional Study from the TwinsUK Cohort
Source: Nutrients. 2023 Apr 14;15(8):1900. doi: 10.3390/nu15081900 (PMC10141398; doi:10.3390/nu15081900)
Supplement: Supplementary file 1 [file nutrients-15-01900-s001.zip › Supplemental table.xlsx]

## Sheet: Table S1
Table S1 Concentration of urinary metabolites detected by UHPLC-MS in spot urine sample (mmol/g creatinine)
Class	Subclass	Compound name	Recommended name	Abbreviation	Concentration (average)	Concentration (SD)
Flavoniods					936557	5.40297e+06
Flavoniods	Flavanols				802555	5.31999e+06
Flavonoids	Flavanols	(-)-Epicatechin	(-)-Epicatechin	EC	3266.75	9464.82
Flavoniods	Flavanols	(-)-Epicatechin-3'-sulfate	(-)-Epicatechin-3'-sulfate	EC-3'-S	799288	5.31107e+06
	Flavanones				80745.9	280154
Flavoniods	Flavanones	Naringenin-4ʹ-glucuronide	Naringenin-4ʹ-glucuronide	Naringenin-4'-GlcUA	29780.6	100922
Flavoniods	Flavanones	Naringenin-7-glucuronide	Naringenin-7-glucuronide	Naringenin-7-GlcUA	9316.47	36850
Flavoniods	Flavanones	rac-Hesperetin-3ʹ-glucuronide	rac-Hesperetin-3ʹ-glucuronide	Hesperetin-3'-GlcUA	33175	153976
Flavoniods	Flavanones	rac-Hesperetin-7-sulfate	rac-Hesperetin-7-sulfate	Hesperetin-7-S	16696.7	67228.2
Flavoniods	Flavanones	Hesperetin	Hesperetin	Hesperetin	1093.61	2544.27
	Flavones				729.258	889.433
Flavoniods	Flavones	Flavone	Flavone	Flavone	729.258	889.433
	Flavonols				50855.9	87554.3
Flavoniods	Flavonols	Quercetin	Quercetin	Quercetin	603.449	2786.96
Flavoniods	Flavonols	Quercetin-3-sulfate	Quercetin 3-sulfate	Quercetin-3-S	2243.74	4042.63
Flavoniods	Flavonols	Quercetin-3-glucuronide	Quercetin 3-glucuronide	Quercetin-3-GlcUA	788.302	1185.25
Flavoniods	Flavonols	Quercetin-7-glucuronide	Quercetin 7-glucuronide	Quercetin-7-GlcUA	1816.35	3112.16
Flavoniods	Flavonols	Kaempferol-3-glucuronide	Kaempferol 3-glucuronide	Kaempferol-3-GlcUA	757.144	1697.11
Flavoniods	Flavonols	Myricetin	Myricetin	Myricetin	41178.1	71957
Flavoniods	Flavonols	Morin	Morin	Morin	3468.84	5897.38
	Dihydrochalcones				190.428	711.899
Flavoniods	Dihydrochalcones	Phloretin	Phloretin	Phloretin	190.428	711.899
	Isoflavonoids				1480.4	4079.35
Flavoniods	Isoflavonoids	Equol-7-glucuronide	Equol-7-glucuronide	Equol-7-GlcUA	682.156	2346.55
Flavoniods	Isoflavonoids	Equol-4ʹ-sulfate	Equol-4ʹ-sulfate	Equol-4ʹ-S	47.8682	279.607
Flavoniods	Isoflavonoids	Daidzein	Daidzein	Daidzein	750.373	3081.93
Lignans					102918	226976
Lignans	Lignans	Secoisolariciresinol	Secoisolariciresinol	SECO	983.576	1405.82
Lignans	Lignans	Enterodiol	Enterodiol	Enterodiol	43.762	199.969
Lignans	Lignans	Enterolactone	Enterolactone	Enterolactone	605.485	1620.49
Lignans	Lignans	Enterolactone-glucuronide	Enterolactone-glucuronide	Enterolactone-GlcUA	93881.9	204774
Lignans	Lignans	Enterolactone-sulfate	Enterolactone-sulfate	Enterolactone-S	7403.63	21389.7
Other (poly)phenols					1.24111e+06	2.01948e+06
	Benzene diols and triols				1.08414e+06	1.80989e+06
Other (poly)phenols	Benzene diols and triols	4-Methylcatechol	1,2-Dihydroxy-4-methylbenzene	1,2-diOH-4-Me-Benz	25498.8	36873.2
Other (poly)phenols	Benzene diols and triols	4-Methylcatechol-1/2-sulfate	2-Hydroxy-4/5-methylbenzene-1-sulfate	2-OH-4/5-Me-Benz-1-S	415307	692489
Other (poly)phenols	Benzene diols and triols	Catechol-1-glucuronide	2-Hydroxybenzene-1-glucuronide	2-OH-Benz-1-GlcUA	22906	71052.9
Other (poly)phenols	Benzene diols and triols	Pyrogallol-1-sulfate	2,3-Dihydroxybenzene-1-sulfate	2,3-diOH-Benz-1-S	9952.02	27284.7
Other (poly)phenols	Benzene diols and triols	Pyrogallol-2-sulfate	2,6-Dihydroxybenzene-1-sulfate	2,6-diOH-Benz-1-S	22294.9	44279.7
Other (poly)phenols	Benzene diols and triols	1-Methylpyrogallol-2/3-sulfate	2-Hydroxy-6/3-methoxybenzene-1-sulfate	2-OH-6/3-meO-Benz-1-S	474021	1.07607e+06
Other (poly)phenols	Benzene diols and triols	2-Methylpyrogallol-1-sulfate	3-Hydroxy-2-methoxybenzene-1-sulfate	3-OH-2-meO-Benz-1-S	114160	272187
	Benzaldehydes				6152.19	9572.56
Other (poly)phenols	Benzaldehydes	3,4-Dihydroxybenzaldehyde	3,4-Dihydroxybenzaldehyde	3,4-diOH-BAL	42.3447	158.197
Other (poly)phenols	Benzaldehydes	4-Hydroxybenzaldehyde	4-Hydroxybenzaldehyde	4-OH-BAL	1774.7	2655.54
Other (poly)phenols	Benzaldehydes	Vanillin	4-Hydroxy-3-methoxybenzaldehyde	4-OH-3-meO-BAL	4335.15	7715.07
	Hydroxycoumarins				5304.51	12582.6
Other (poly)phenols	Hydroxycoumarins	7,8-Dihydroxycoumarin	7,8-Dihydroxycoumarin	7,8-diOH-CM	279.07	437.5
Other (poly)phenols	Hydroxycoumarins	Urolithin A	3,8-Dihydroxy-urolithin	3,8-diOH-Uro	2928.39	9620.69
Other (poly)phenols	Hydroxycoumarins	Urolithin B	3-Hydroxy-urolithin	3-OH-Uro	2097.05	6425.72
	Tyrosols				145518	466708
Other (poly)phenols	Tyrosols	Tyrosol	2-(4-hydroxyphenyl)ethanol	4ʹ-OH-ph-ethOH	32887.6	202203
Other (poly)phenols	Tyrosols	Tyrosol sulfate	Phenylethanol-4-sulfate	ph-etOH-4ʹ-S	83032.3	282253
Other (poly)phenols	Tyrosols	Hydroxytyrosol	3,4-Dihydroxyphenylethanol	3ʹ,4ʹ-diOH-ph-etOH	184.199	641.798
Other (poly)phenols	Tyrosols	Hydroxytyrosol-4-sulfate	3-Hydroxyphenylethanol-4-sulfate	3ʹ-OH-ph-etOH-4ʹ-S	7431.66	30789.8
Other (poly)phenols	Tyrosols	Hydroxytyrosol-3-sulfate	4-Hydroxyphenylethanol-3-sulfate	4ʹ-OH-ph-etOH-3ʹ-S	21982.6	126107
Phenolic acids					5.52142e+06	9.40763e+06
	Hydroxybenzoic acids				948907	1.76789e+06
Phenolic acids	Hydroxybenzoic acids	Benzoic acid	Benzoic acid	BA	304069	1.12189e+06
Phenolic acids	Hydroxybenzoic acids	2-Hydroxybenzoic acid	2-Hydroxybenzoic acid	2-OH-BA	43214.3	265099
Phenolic acids	Hydroxybenzoic acids	3-Hydroxybenzoic acid	3-Hydroxybenzoic acid	3-OH-BA	73371.4	519082
Phenolic acids	Hydroxybenzoic acids	4-Hydroxybenzoic acid	4-Hydroxybenzoic acid	4-OH-BA	58574.7	102101
Phenolic acids	Hydroxybenzoic acids	2,3-Dihydroxybenzoic acid	2,3-Dihydroxybenzoic acid	2,3-diOH-BA	16306.5	56791.1
Phenolic acids	Hydroxybenzoic acids	2,4-Dihydroxybenzoic acid	2,4-Dihydroxybenzoic acid	2,4-diOH-BA	49621	94255.9
Phenolic acids	Hydroxybenzoic acids	2,5-Dihydroxybenzoic acid	2,5-Dihydroxybenzoic acid	2,5-diOH-BA	65290.6	118292
Phenolic acids	Hydroxybenzoic acids	2,6-Dihydroxybenzoic acid	2,6-Dihydroxybenzoic acid	2,6-diOH-BA	21091.5	36825.3
Phenolic acids	Hydroxybenzoic acids	Protocatechuic acid	3,4-Dihydroxybenzoic acid	3,4-diOH-BA	5284.67	13527.8
Phenolic acids	Hydroxybenzoic acids	3,5-Dihydroxybenzoic acid	3,5-Dihydroxybenzoic acid	3,5-diOH-BA	29375.3	56981.6
Phenolic acids	Hydroxybenzoic acids	2,3,4-Trihydroxybenzoic acid	2,3,4-Trihydroxybenzoic acid	2,3,4-triOH-BA	448.999	801.438
Phenolic acids	Hydroxybenzoic acids	2-Hydroxy-4-methoxybenzoic acid	2-Hydroxy-4-methoxybenzoic acid	2-OH-4-meO-BA	32.0631	56.066
Phenolic acids	Hydroxybenzoic acids	Protocatechuic acid-4-sulfate	3-Hydroxybenzoic acid-4-sulfate	3-OH-BA-4-S	39858.9	128908
Phenolic acids	Hydroxybenzoic acids	Protocatechuic acid-3-sulfate	4-Hydroxybenzoic acid-3-sulfate	4-OH-BA-3-S	12256.8	27813.4
Phenolic acids	Hydroxybenzoic acids	Protocatechuic acid-3-glucuronide	4-Hydroxybenzoic acid-3-glucuronide	4-OH-BA-3-GlcUA	490.864	1892.19
Phenolic acids	Hydroxybenzoic acids	Syringic acid	4-Hydroxy-3,5-dimethoxybenzoic acid	4-OH-3,5-dimeO-BA	7972.96	13549.3
Phenolic acids	Hydroxybenzoic acids	Ethyl gallate	3,4,5-Trihydroxybenzene ethyl ester	3,4,5-triOH-Benz-OEt	258.788	435.004
Phenolic acids	Hydroxybenzoic acids	Gallic acid	3,4,5-Trihydroxybenzoic acid	3,4,5-triOH-BA	5282.08	14576.4
Phenolic acids	Hydroxybenzoic acids	4-Methylgallic acid-3-sulfate	3-Hydroxy-4-methoxybenzoic acid-5-sulfate	3-OH-4-meO-BA-5-S	54343.3	151948
Phenolic acids	Hydroxybenzoic acids	Vanillic acid	4-Hydroxy-3-methoxybenzoic acid	4-OH-3-meO-BA	9364.34	18502.3
Phenolic acids	Hydroxybenzoic acids	Vanillic acid-4-sulfate	3-Methoxybenzoic acid-4-sulfate	3-meO-BA-4-S	44906.7	109975
Phenolic acids	Hydroxybenzoic acids	Isovanillic acid-3-sulfate	4-Methoxybenzoic acid-3-sulfate	4-meO-BA-3-S	105132	203311
Phenolic acids	Hydroxybenzoic acids	Ellagic acid	Ellagic acid	EA	2360.09	6583.92
	Hippuric acids				3.30145e+06	5.83547e+06
Phenolic acids	Hippuric acids	Hippuric acid	Hippuric acid	HA	2.6499e+06	4.88748e+06
Phenolic acids	Hippuric acids	2ʹ-Hydroxyhippuric acid	2ʹ-Hydroxyhippuric acid	2ʹ-OH-HA	202381	622153
Phenolic acids	Hippuric acids	3ʹ-Hydroxyhippuric acid	3ʹ-Hydroxyhippuric acid	3ʹ-OH-HA	393534	857452
Phenolic acids	Hippuric acids	4ʹ-Hydroxyhippuric acid	4ʹ-Hydroxyhippuric acid	4ʹ-OH-HA	55190	75087.8
Phenolic acids	Hippuric acids	α-hydroxyhippuric acid	alpha-hydroxyhippuric acid	α-OH-HA	442.263	1559.22
	Cinnamic acids				649381	1.70731e+06
Phenolic acids	Cinnamic acids	Cinnamic acid	Cinnamic acid	CA	2253.38	4410.88
Phenolic acids	Cinnamic acids	Caffeic acid	3ʹ,4ʹ-Dihydroxycinnamic acid	3ʹ,4ʹ-diOH-CA	7145.11	15895.5
Phenolic acids	Cinnamic acids	Caffeic acid-4ʹ-sulfate	3ʹ-Hydroxycinnamic acid-4ʹ-sulfate	3ʹ-OH-CA-4ʹ-S	6635.29	17350
Phenolic acids	Cinnamic acids	Caffeic acid-3ʹ-sulfate	4ʹ-Hydroxycinnamic acid-3ʹ-sulfate	4ʹ-OH-CA-3ʹ-S	54865.7	219188
Phenolic acids	Cinnamic acids	Caffeic acid-4ʹ-glucuronide	3ʹ-Hydroxycinnamic acid-4ʹ-glucuronide	3ʹ-OH-CA-4ʹ-GlcUA	10635.5	14495.2
Phenolic acids	Cinnamic acids	Caffeic acid-3ʹ-glucuronide	4ʹ-Hydroxycinnamic acid-3ʹ-glucuronide	4ʹ-OH-CA-3ʹ-GlcUA	1680.53	3617.24
Phenolic acids	Cinnamic acids	trans-Ferulic acid	4ʹ-Hydroxy-3ʹ-methoxycinnamic acid	4ʹ-OH-3ʹ-meO-CA	170759	396946
Phenolic acids	Cinnamic acids	Ferulic acid-4ʹ-sulfate	3ʹ-Methoxycinnamic acid-4ʹ-sulfate	3ʹ-meO-CA-4ʹ-S	118069	256630
Phenolic acids	Cinnamic acids	Ferulic acid-4ʹ-glucuronide	3ʹ-Methoxycinnamic acid-4ʹ-glucuronide	3ʹ-meO-CA-4ʹ-GlcUA	16357.9	29543.5
Phenolic acids	Cinnamic acids	Isoferulic acid	3ʹ-Hydroxy-4ʹ-methoxycinnamic acid	3ʹ-OH-4ʹ-meO-CA	47150.3	156891
Phenolic acids	Cinnamic acids	Isoferulic acid-3ʹ-sulfate	4ʹ-Methoxycinnamic acid-3ʹ-sulfate	4ʹ-meO-CA-3ʹ-S	136896	674223
Phenolic acids	Cinnamic acids	Isoferulic acid-3ʹ-glucuronide	4ʹ-Methoxycinnamic acid-3ʹ-glucuronide	4ʹ-meO-CA-3ʹ-GlcUA	28188.3	47822.1
Phenolic acids	Cinnamic acids	Cryptochlorogenic acid	4-O-Caffeoylquinic acid	4-CQA	1807.97	6862.55
Phenolic acids	Cinnamic acids	Chlorogenic acid	5-O-Caffeoylquinic acid	5-CQA	3275.14	13482.2
Phenolic acids	Cinnamic acids	3-O-Feruloylquinic acid	3-O-Feruloylquinic acid	3-FQA	7944.44	36440
Phenolic acids	Cinnamic acids	4-O-Feruloylquinic acid	4-O-Feruloylquinic acid	4-FQA	7308.28	31401.3
Phenolic acids	Cinnamic acids	Sinapic acid	4ʹ-Hydroxy-3ʹ,5ʹ-dimethoxycinnamic acid	4ʹ-OH-3ʹ,5ʹ-dimeO-CA	2462.25	5637.72
Phenolic acids	Cinnamic acids	m-Coumaric acid	3ʹ-Hydroxycinnamic acid	3ʹ-OH-CA	8287.63	18585.9
Phenolic acids	Cinnamic acids	p-Coumaric acid	4ʹ-Hydroxycinnamic acid	4ʹ-OH-CA	4429.93	7055.18
Phenolic acids	Cinnamic acids	o-Coumaric acid	2ʹ-Hydroxycinnamic acid	2ʹ-OH-CA	698.091	1920.66
Phenolic acids	Cinnamic acids	p-Coumaric acid-4ʹ-sulfate	Cinnamic acid-4ʹ-sulfate	CA-4ʹ-S	9692.56	15100.4
Phenolic acids	Cinnamic acids	p-Coumaric acid-4ʹ-glucuronide	Cinnamic acid-4ʹ-glucuronide	CA-4ʹ-GlcUA	2838.67	4483.34
	Phenylacetic acids				52773.8	70757.8
Phenolic acids	Phenylacetic acids	Phenylacetic acid	Phenylacetic acid	PA	5043.56	21070.1
Phenolic acids	Phenylacetic acids	3ʹ-Hydroxyphenylacetic acid	3ʹ-Hydroxyphenylacetic acid	3ʹ-OH-PA	2.72619e+07	3.54015e+07
Phenolic acids	Phenylacetic acids	Homoprotocatechuic acid	3ʹ,4ʹ-Dihidroxyphenylacetic acid	3ʹ,4ʹ-diOH-PA	37815.9	44915.8
Phenolic acids	Phenylacetic acids	Homovanillic acid-sulfate	3ʹ-Methyoxyphenylacetic acid-4ʹ-sulfate	3ʹ-meO-PA-4ʹ-S	9914.36	19068.3
	Phenylpropanoic acids				394518	665735
Phenolic acids	Phenylpropanoic acids	2-(4ʹ-Hydroxyphenoxy)propanoic acid	2-(4ʹ-Hydroxyphenoxy)propanoic acid	2-(4ʹ-OH-ph-O)-PrA	10884.2	26106.4
Phenolic acids	Phenylpropanoic acids	3-(2ʹ-Hydroxyphenyl)propanoic acid	3-(2ʹ-Hydroxyphenyl)propanoic acid	3-(2ʹ-OH-ph)-PrA	1252.28	1554.89
Phenolic acids	Phenylpropanoic acids	3-(3ʹ-Hydroxyphenyl)propanoic acid	3-(3ʹ-Hydroxyphenyl)propanoic acid	3-(3ʹ-OH-ph)-PrA	36906.8	136525
Phenolic acids	Phenylpropanoic acids	3-(2ʹ,3ʹ-Dihydroxyphenyl)propanoic acid	3-(2ʹ,3ʹ-Dihydroxyphenyl)propanoic acid	3-(2ʹ,3ʹ-diOH-ph)-PrA	7001.96	30235.9
Phenolic acids	Phenylpropanoic acids	3-(2ʹ,4ʹ-Dihydroxyphenyl)propanoic acid	3-(2ʹ,4ʹ-Dihydroxyphenyl)propanoic acid	3-(2ʹ,4ʹ-diOH-ph)-PrA	69130.3	168330
Phenolic acids	Phenylpropanoic acids	Dihydrocaffeic acid	3-(3ʹ,4ʹ-Dihydroxyphenyl)propanoic acid	3-(3ʹ,4ʹ-diOH-ph)-PrA	53214.4	111697
Phenolic acids	Phenylpropanoic acids	3-(3ʹ,5ʹ-Dihydroxyphenyl)propanoic acid	3-(3ʹ,5ʹ-Dihydroxyphenyl)propanoic acid	3-(3ʹ,5ʹ-diOH-ph)-PrA	90098.1	219019
Phenolic acids	Phenylpropanoic acids	2-Hydroxy-3-(4ʹ-hydroxyphenyl)propanoic acid	2-Hydroxy-3-(4ʹ-hydroxyphenyl)propanoic acid	3-(4ʹ-OH-ph)-2-OH-PrA	38926.8	57445.7
Phenolic acids	Phenylpropanoic acids	Dihydroferulic acid	3-(4ʹ-Hydroxy-3ʹ-methoxyphenyl)propanoic acid	3-(4ʹ-OH-3ʹ-meO-ph)-PrA	7555.61	12691.7
Phenolic acids	Phenylpropanoic acids	Dihydrocaffeic acid-3ʹ-glucuronide	3-(4ʹ-Hydroxyphenyl)propanoic acid-3ʹ-glucuronide	3-(4ʹ-OH-ph)-PrA-3ʹ-GlcUA	44012.3	70507.2
Phenolic acids	Phenylpropanoic acids	Dihydrocaffeic acid-3ʹ-sulfate	3-(4ʹ-Hydroxyphenyl)propanoic acid-3ʹ-sulfate	3-(4ʹ-OH-ph)-PrA-3ʹ-S	13741	25747.7
Phenolic acids	Phenylpropanoic acids	Dihydroferulic acid-4ʹ-sulfate	3-(3ʹ-Methoxyphenyl)propanoic acid-4ʹ-sulfate	3-(3ʹ-meO-ph)-PrA-4ʹ-S	5455.01	7930.46
Phenolic acids	Phenylpropanoic acids	Dihydroferulic acid-4ʹ-glucuronide	3-(3ʹ-Methoxyphenyl)propanoic acid-4ʹ-glucuronide	3-(3ʹ-meO-ph)-PrA-4ʹ-GlcUA	10469.3	23642.6
Phenolic acids	Phenylpropanoic acids	Dihydroisoferulic acid-3ʹ-sulfate	3-(4ʹ-Methoxyphenyl)propanoic acid-3ʹ-sulfate	3-(4ʹ-meO-ph)-PrA-3ʹ-S	5869.87	13150.5
Phenolic acids	Phenylpropanoic acids	Dihydroisoferulic acid-3ʹ-glucuronide	3-(4ʹ-Methoxyphenyl)propanoic acid-3ʹ-glucuronide	3-(4ʹ-meO-ph)-PrA-3ʹ-GlcUA	174392	360569
	Phenyl-γ-valerolactones				698.133	1214.24
Phenolic acids	Phenyl-γ-valerolactones	(4R)-5-(3',4'-Dihydroxyphenyl)-γ-valerolactone-4'-sulfate	(4R)-5-(3'-hydroxyphenyl)-γ-valerolactone-4'-sulfate	5-(3'-OH-ph)-γ-VL-4'-S	698.133	1214.24
Stilbenes					20825	71122.5
Stilbenes	Stilbenes	trans-Resveratrol-4ʹ-glucuronide	trans-Resveratrol-4ʹ-glucuronide	t-Res-4ʹ-GlcUA	13331.9	67430
Stilbenes	Stilbenes	trans-Resveratrol-3-glucuronide	trans-Resveratrol-3-glucuronide	t-Res-3-GlcUA	834.457	2107.55
Stilbenes	Stilbenes	cis-Resveratrol-4ʹ-glucuronide	cis-Resveratrol-4ʹ-glucuronide	c-Res-4ʹ-GlcUA	1274.9	2632.6
Stilbenes	Stilbenes	cis-Resveratrol-3-glucuronide	cis-Resveratrol-3-glucuronide	c-Res-3-GlcUA	2197.78	4353.52
Stilbenes	Stilbenes	trans-Resveratrol-3-Sulfate	trans-Resveratrol-3-Sulfate	t-Res-3-S	2487.9	13646.4
Total (poly)phenol					7.82283e+06	1.71282e+07

## Sheet: Table S2
Table S2 Associations between urinary (poly)phenol metabolites and alpha diversity in the TwinsUK cohort (adjusted for family relatedness, age, BMI, energy intake and fibre intake)
Alpha diversity	Metabolites	Common name	Subclass	stdBeta (95% CI)	FDR p value
Shannon diversity	4-Hydroxybenzoic acid-3-glucuronide	Protocatechuic acid-3-glucuronide	Phenolic acids	-0.19 (-0.32, -0.06)	0.04
Shannon diversity	2-Hydroxycinnamic acid	o-Coumaric acid	Phenolic acids	0.14 (0.01, 0.28)	0.04
Shannon diversity	3-(2-Hydroxyphenyl)propanoic acid	3-(2-Hydroxyphenyl)propanoic acid	Phenolic acids	0.15 (0.02, 0.29)	0.03
Shannon diversity	2-Hydroxy-4/5-methylbenzene-1-sulfate	4-Methylcatechol-1/2-sulfate	Other (poly)phenols	0.17 (0.04, 0.30)	0.01
Shannon diversity	1,2-Dihydroxy-4-methylbenzene	4-Methylcatechol	Other (poly)phenols	0.20 (0.07, 0.33)	0.04
Shannon diversity	Benzene diols and triols	Total benzene diols and triols	Other (poly)phenols	0.14 (0.01, 0.27)	0.04
Shannon diversity	Enterolactone-glucuronide	Enterolactone-glucuronide	Lignans	0.19 (0.06, 0.33)	0.04
Shannon diversity	Enterolactone-sulfate	Enterolactone-sulfate	Lignans	0.15 (0.01, 0.28)	0.03
Shannon diversity	Enterolactone	Enterolactone	Lignans	0.13 (0.001, 0.27)	0.05
Shannon diversity	Total lignans	Total lignans	Lignans	0.19 (0.06, 0.32)	0.04
Shannon diversity	trans-Resveratrol 4-glucuronide	trans-Resveratrol 4-glucuronide	Stilbenes	0.15 (0.01, 0.28)	0.03
Shannon diversity	Total stilbenes	Total stilbenes	Stilbenes	0.14 (0.01, 0.27)	0.04
Observed OTU numbers	4-Hydroxybenzoic acid-3-glucuronide	Protocatechuic acid-3-glucuronide	Phenolic acids	-0.16 (-0.28, -0.04)	0.01
Observed OTU numbers	3-Dihydroxycinnamic acid-4-glucuronide	Caffeic acid-4-glucuronide	Phenolic acids	0.13 (0.001, 0.26)	0.05
Observed OTU numbers	2-Hydroxy-4-methoxybenzoic acid	2-Hydroxy-4-methoxybenzoic acid	Phenolic acids	0.13 (0.01, 0.26)	0.04
Observed OTU numbers	2,3,4-Trihydroxybenzoic acid	2,3,4-Trihydroxybenzoic acid	Phenolic acids	0.14 (0.01, 0.26)	0.03
Observed OTU numbers	Quercetin 7-glucuronide	Quercetin 7-glucuronide	Flavonols	0.14 (0.01, 0.26)	0.04
Observed OTU numbers	Myricetin	Myricetin	Flavonols	0.13 (0.01, 0.26)	0.04
Observed OTU numbers	Enterolactone-glucuronide	Enterolactone-glucuronide	Lignans	0.18 (0.06, 0.30)	0.04
Observed OTU numbers	Total lignans	Total lignans	Lignans	0.17 (0.05, 0.30)	0.04
Observed OTU numbers	trans-Resveratrol 4-glucuronide	trans-Resveratrol 4-glucuronide	Stilbenes	0.15 (0.03, 0.27)	0.02
Observed OTU numbers	Total stilbenes	Total stilbenes	Stilbenes	0.14 (0.02, 0.26)	0.03
